# Supplementary material for: An Analysis of the Perceptions and Resources of Large University Classes
Source: Atypon-hosted journal article supplement (doi:10.1187/cbe.16-01-0004), 2017-05-12
Supplement: combinedsupmats.pdf [file combinedsupmats.pdf]

# Supplemental Material

*CBE—Life Sciences Education*

Cash *et al.*

## **Instructor Survey script**

You are invited to take part in a research study looking at the class dynamics in the College of Biological Sciences (CBS) at the University of Guelph. (*Note: Intentionally vague*)

**ELIGIBILITY** To be eligible to participate in the study, you must be an instructor in the College of Biological Sciences at the University of Guelph.

**PARTICIPATION** This online survey is expected to take 10-15 minutes to complete. Participation is completely voluntary and you may skip any question you would prefer not to answer. **You may also withdraw your consent** to participate at any time without any repercussions up to the point of submission. After which, your data cannot be withdrawn due to the anonymous nature of the survey. Partially completed surveys will be automatically discarded after a week. (*\*Note: This is the only timeframe Qualtrics allows\**)

Please note that it will not affect the student researcher's grade if you decide not to participate or withdraw part-way through the study.

**RISKS** There are no foreseeable risks of harm in completing this survey.

**BENEFITS** While there is no direct benefit to you, your participation may help improve the student learning experience at the University of Guelph.

**INCENTIVE** By participating in this study, you will be given an opportunity to win one of five \$10 Hospitality Services Gift Cards. If you choose to enter the draw, an e-mail address will need to be provided but this personal information will not be attached to your survey responses. Estimated odds of winning are 1 in 487. Actual odds depend on the number of participants.

**CONFIDENTIALITY** Your confidentiality is highly valued. As such, no identifiable information such as your name and IP address will be collected during the survey. Please note that confidentiality cannot be guaranteed while data are in transit over the internet. As well, due to the relatively small sample size, your confidentiality can not be guaranteed. Your responses will be stored in a password-protected electronic format in a secure office and will only be viewed by the 4<sup>th</sup> year research student and the two faculty advisors. Collected data will be kept for 5 years and may be used to facilitate future studies.

The results of this study will be presented as part of a poster presentation on March 31, 2015 between 1-3 pm (location – to be determined) and the researchers will undertake to publish the results in a peer-reviewed journal. If the results of the study are published, no identifiable information will be released or published without your specific consent of disclosure.

## QUESTIONS

If you have any questions about the project, you can contact the research team:

Jessa Letargo, 4<sup>th</sup> Year Research Student, Interdisciplinary Program,  
[jletargo@mail.uoguelph.ca](mailto:jletargo@mail.uoguelph.ca)

Steffen Graether, Associate Professor, Department of Molecular and Cellular Biology,  
[graether@uoguelph.ca](mailto:graether@uoguelph.ca), ext. 56457

Shoshanah Jacobs, Assistant Professor, Department of Integrative Biology,  
[sjacob04@uoguelph.ca](mailto:sjacob04@uoguelph.ca), ext. 58096

Please address any questions about ethical concerns and your rights as a research participant to:

S. Auld  
Director, Research Ethics  
[reb@uoguelph.ca](mailto:reb@uoguelph.ca)  
519-824-4120 ext.56606

---

**ELECTRONIC CONSENT:** You are encouraged to print a copy of this consent form for your own records. By clicking on the “I Consent” button, you are indicating that: 1. You have read the above information 2. You voluntarily agree to participate

- I Consent (1)
- I Do Not Consent (2)

If I Do Not Consent Is Selected, Then Skip To Thank You for your Interest! We ...

Q2 Do you identify as:

- Male (1)
- Female (2)
- Other: (3) \_\_\_\_\_

Q3 Please indicate your Main Field of Teaching

- Biochemistry (1)
- Biodiversity (2)
- Biological Science (3)
- Biomedical Science (4)
- Human Kinetics (5)
- Marine and Freshwater Biology (6)
- Microbiology (7)
- Molecular Biology and Genetics (8)
- Nutritional and Nutraceutical Sciences (9)
- Plant Science (10)
- Toxicology (11)
- Wildlife Biology and Conservation (12)
- Zoology (13)
- Other: (14) \_\_\_\_\_

Q4 How long have you been teaching at the undergraduate level? Please select 1 if teaching experience is less than or equals a year.

\_\_\_\_\_ Number of Years (1)

Q5 Please indicate if you have taught or are currently teaching a large, medium-size and/or small class at the undergraduate level.

|                        | -                     |                       |
|------------------------|-----------------------|-----------------------|
|                        | Yes (1)               | No (2)                |
| Large Class (1)        | <input type="radio"/> | <input type="radio"/> |
| Medium-Sized Class (2) | <input type="radio"/> | <input type="radio"/> |
| Small Class (3)        | <input type="radio"/> | <input type="radio"/> |

Q6 What do you consider to be a large, medium-size and small university class? Please enter a range of numbers. (ie. minimum number - maximum number)

|                       | Minimum (1) | Maximum (2) |
|-----------------------|-------------|-------------|
| Large Class (1)       |             |             |
| Medium-Size Class (2) |             |             |
| Small Class (3)       |             |             |

Q9 Aside from the number of students, how would you characterize a large class?

Q10 Aside from the number of students, how would you characterize a medium-size class?

Q11 Aside from the number of students, how would you characterize a small class?

Q12 Do you think class size affects the quality of learning?

Yes (1)

No (2)

Answer If Do you think class size affects the quality of learning? Yes Is Selected

Q13 Please explain how class size affects the quality of student learning.

Answer If Do you think class size affects the quality of learning? No Is Selected

Q14 Why do you think class size does not affect the quality of student learning.

Q15 Please indicate if the following statements apply to the following class sizes. Check all that apply.

|                                                      | Small Class (1)          | Medium-Size Class (2)    | Large Class (3)          | I do not identify with this statement (4) |
|------------------------------------------------------|--------------------------|--------------------------|--------------------------|-------------------------------------------|
| I enjoy teaching (1)                                 | <input type="checkbox"/> | <input type="checkbox"/> | <input type="checkbox"/> | <input type="checkbox"/>                  |
| I encourage class participation (2)                  | <input type="checkbox"/> | <input type="checkbox"/> | <input type="checkbox"/> | <input type="checkbox"/>                  |
| I am disrupted by students' noise while teaching (3) | <input type="checkbox"/> | <input type="checkbox"/> | <input type="checkbox"/> | <input type="checkbox"/>                  |
| I feel disconnected from my students (4)             | <input type="checkbox"/> | <input type="checkbox"/> | <input type="checkbox"/> | <input type="checkbox"/>                  |
| I incorporate active learning in my classes (10)     | <input type="checkbox"/> | <input type="checkbox"/> | <input type="checkbox"/> | <input type="checkbox"/>                  |
| My students are not engaged in my classes (5)        | <input type="checkbox"/> | <input type="checkbox"/> | <input type="checkbox"/> | <input type="checkbox"/>                  |
| My students ask and answer questions in class (7)    | <input type="checkbox"/> | <input type="checkbox"/> | <input type="checkbox"/> | <input type="checkbox"/>                  |
| My students perform well in class (6)                | <input type="checkbox"/> | <input type="checkbox"/> | <input type="checkbox"/> | <input type="checkbox"/>                  |
| I actively seek student feedback in class (8)        | <input type="checkbox"/> | <input type="checkbox"/> | <input type="checkbox"/> | <input type="checkbox"/>                  |

Q16 Do your office hours change with class size?

- Yes (1)
- No (2)

Answer If Do your office hours change with class size? Yes Is Selected

Q17 Do you offer more or less office hours to your large classes?

- More (1)
- The Same (2)
- Less (3)

Q18 Does your teaching style change with class size?

- Yes (1)
- No (2)

Answer If Does your teaching style change with class size? Yes Is Selected

Q19 If yes, in what way does it change? Please explain.

Q20 Please indicate what teaching methods you use in the following class sizes. Check all that apply.

|                            | Small Class (1)          | Medium-Size Class (2)    | Large Class (3)          | This is/was not used in my classes. (4) |
|----------------------------|--------------------------|--------------------------|--------------------------|-----------------------------------------|
| Lecture Only (1)           | <input type="checkbox"/> | <input type="checkbox"/> | <input type="checkbox"/> | <input type="checkbox"/>                |
| Class Discussion (2)       | <input type="checkbox"/> | <input type="checkbox"/> | <input type="checkbox"/> | <input type="checkbox"/>                |
| Class Demonstration (3)    | <input type="checkbox"/> | <input type="checkbox"/> | <input type="checkbox"/> | <input type="checkbox"/>                |
| Student Group Activity (5) | <input type="checkbox"/> | <input type="checkbox"/> | <input type="checkbox"/> | <input type="checkbox"/>                |
| Other: (4)                 | <input type="checkbox"/> | <input type="checkbox"/> | <input type="checkbox"/> | <input type="checkbox"/>                |

Q21 Please indicate if the following evaluation methods have been used in the following class sizes.

|                                            | Small Class (1)          | Medium-Size Class (2)    | Large Class (3)          | This is/was not used in my classes. (4) |
|--------------------------------------------|--------------------------|--------------------------|--------------------------|-----------------------------------------|
| Labs (1)                                   | <input type="checkbox"/> | <input type="checkbox"/> | <input type="checkbox"/> | <input type="checkbox"/>                |
| Seminars/Tutorials (2)                     | <input type="checkbox"/> | <input type="checkbox"/> | <input type="checkbox"/> | <input type="checkbox"/>                |
| Regular Quizzes (3)                        | <input type="checkbox"/> | <input type="checkbox"/> | <input type="checkbox"/> | <input type="checkbox"/>                |
| Written Evaluations (e.g. Essays) (4)      | <input type="checkbox"/> | <input type="checkbox"/> | <input type="checkbox"/> | <input type="checkbox"/>                |
| Group Project (6)                          | <input type="checkbox"/> | <input type="checkbox"/> | <input type="checkbox"/> | <input type="checkbox"/>                |
| Oral Presentation (7)                      | <input type="checkbox"/> | <input type="checkbox"/> | <input type="checkbox"/> | <input type="checkbox"/>                |
| Participation in Courselink Discussion (8) | <input type="checkbox"/> | <input type="checkbox"/> | <input type="checkbox"/> | <input type="checkbox"/>                |
| Midterm (9)                                | <input type="checkbox"/> | <input type="checkbox"/> | <input type="checkbox"/> | <input type="checkbox"/>                |
| Final Examination (10)                     | <input type="checkbox"/> | <input type="checkbox"/> | <input type="checkbox"/> | <input type="checkbox"/>                |
| Others: (5)                                | <input type="checkbox"/> | <input type="checkbox"/> | <input type="checkbox"/> | <input type="checkbox"/>                |



Q22 Has there ever been a time when a numerically large class felt small? Please explain.

Q23 End of Survey

Thank you for your participation! We truly value the information you have provided. Your responses will help us further understand the various dynamics that define class sizes in the College of Biological Sciences at the University of Guelph. If you would like to enter a draw for a chance to win a \$10 Hospitality Services Gift Card, please click on the link below.

<Click for a chance to win 1 of 5 \$10 Hospitality Services Gift Card>

Q24 Thank You for your Interest! We hope that you would reconsider participating in the survey at a later time.

## **Student survey script**

You are invited to take part in a research study looking at the class dynamics in the College of Biological Sciences (CBS) at the University of Guelph. (*Note: Intentionally vague*)

**ELIGIBILITY** To be eligible to participate in the study, you must be a CBS major in second year or above.

**PARTICIPATION** This online survey is expected to take 10-15 minutes to complete. Participation is completely voluntary and you may skip any question you would prefer not to answer. **You may also withdraw your consent** to participate at any time without any repercussions up to the point of submission. After which, your data cannot be withdrawn due to the anonymous nature of the survey. Partially completed surveys will be automatically discarded after a week. (*\*Note: This is the only timeframe Qualtrics allows\**)

Please note that it will not affect the student researcher's grade if you decide not to participate or withdraw part-way through the study

**RISKS** There are no foreseeable risks of harm in completing this survey.

**BENEFITS** While there is no direct benefit to you, your participation may help improve the student learning experience at the University of Guelph.

**INCENTIVE** By participating in this study, you will be given an opportunity to win one of five \$10 Hospitality Services Gift Cards. If you choose to enter the draw, an e-mail address will need to be provided but this personal information will not be attached to your survey responses. Estimated odds of winning are 1 in 487. Actual odds depend on the number of participants.

**CONFIDENTIALITY** Your confidentiality is highly valued. As such, no identifiable information such as your name and IP address will be collected during the survey. Please note that confidentiality cannot be guaranteed while data are in transit over the internet. As well, due to the relatively small sample size, your confidentiality can not be guaranteed. Your responses will be stored in a password-protected electronic format in a secure office and will only be viewed by the 4<sup>th</sup> year research student and the two faculty advisors. Collected data will be kept for 5 years and may be used to facilitate future studies.

The results of this study will be presented as part of a poster presentation on March 31, 2015 between 1-3 pm (location – to be determined) and the researchers will undertake to publish the results in a peer-reviewed journal. If the results of the study are published, no identifiable information will be released or published without your specific consent of disclosure.

## QUESTIONS

If you have any questions about the project, you can contact the research team:

Jessa Letargo, 4<sup>th</sup> Year Research Student, Interdisciplinary Program,  
[jletargo@mail.uoguelph.ca](mailto:jletargo@mail.uoguelph.ca)

Steffen Graether, Associate Professor, Department of Molecular and Cellular Biology,  
[graether@uoguelph.ca](mailto:graether@uoguelph.ca), ext. 56457

Shoshanah Jacobs, Assistant Professor, Department of Integrative Biology,  
[sjacob04@uoguelph.ca](mailto:sjacob04@uoguelph.ca), ext. 58096

Please address any questions about ethical concerns and your rights as a research participant to:

S. Auld  
Director, Research Ethics  
[reb@uoguelph.ca](mailto:reb@uoguelph.ca)  
519-824-4120 ext. 56606

---

**ELECTRONIC CONSENT:** You are encouraged to print a copy of this consent form for your own records. By clicking on the “I Consent” button, you are indicating that:

1. You have read the above information
2. You voluntarily agree to participate

- I Consent (1)
- I Do Not Consent (2)

If I Do Not Consent Is Selected, Then Skip To Thank You for your interest!

Q2 Do you identify as:

- Male (1)
- Female (2)
- Other: (3) \_\_\_\_\_

Q3 Please indicate your age below

- less than 18 years old (1)
- 18 years old (2)
- 19 years old (3)
- 20 years old (4)
- 21 years old (5)
- 22 years old (6)
- 23 years old (7)
- more than 23 years old (8)

Q4 Are you taking 3 or more courses this semester?

- Yes (1)
- No (2)

Q5 What is your current semester level?

- Semester 1-2 (1)
- Semester 3-4 (2)
- Semester 5-6 (3)
- Semester 7-8 (4)
- More than 8 Semesters (5)

Q6 Please indicate your current major of study

- B.Sc. Biochemistry (1)
- B.Sc. Biodiversity (2)
- B.Sc. Biological Science (3)
- B.Sc. Biomedical Science (4)
- B.Sc. Human Kinetics (5)
- B.Sc. Marine and Freshwater Biology (6)
- B.Sc. Microbiology (7)
- B.Sc. Molecular Biology and Genetics (8)
- B.Sc. Nutritional and Nutraceutical Sciences (9)
- B.Sc. Plant Science (10)
- B.Sc. Toxicology (11)
- B.Sc. Wildlife Biology and Conservation (12)
- B.Sc. Zoology (13)
- Other: (14) \_\_\_\_\_

Q7 What is your current cumulative GPA?

- Greater or Equal to 90% (1)
- 80-89% (2)
- 70-79% (3)
- 60-69% (4)
- Less than 60% (5)

The demographic data and responses are linked together for analytical purposes.

Q8 Have you been or are currently enrolled in a large, medium-size and small class?

|                       | -                     |                       |
|-----------------------|-----------------------|-----------------------|
|                       | Yes (1)               | No (2)                |
| Large Class (1)       | <input type="radio"/> | <input type="radio"/> |
| Medium-Size Class (2) | <input type="radio"/> | <input type="radio"/> |
| Small Class (3)       | <input type="radio"/> | <input type="radio"/> |

Q9 What do you consider to be a large, medium-size and small university class? Please enter a range of numbers. (ie. minimum number - maximum number)

|                       | Minimum Number (1) | Maximum Number (2) |
|-----------------------|--------------------|--------------------|
| Large Class (1)       |                    |                    |
| Medium-Size Class (2) |                    |                    |
| Small Class (3)       |                    |                    |

Q12 Aside from the number of students, how would you characterize a large class?

Q13 Aside from the number of students, how would you characterize a medium-size class?

Q14 Aside from the number of students, how would you characterize a small class?

Q15 Do you think class size affects the quality of learning?

- Yes (1)
- No (2)

Answer If Do you think class size affects the quality of learning? Yes Is Selected

Q16 What factors do you think assist and/or hinder your learning in large classes?

Q17 Please take a moment to think of your favourite (or least hated) university class. Putting the course content aside, what made you really like this class? Please indicate the course code or name if possible.

Q18 Please indicate if the following statements apply to the following class sizes. Check all that apply.

|                                                          | Small Class (1)          | Medium-Size Class (2)    | Large Class (3)          | I do not identify with this statement. (4) |
|----------------------------------------------------------|--------------------------|--------------------------|--------------------------|--------------------------------------------|
| I do not feel engaged in my classes (1)                  | <input type="checkbox"/> | <input type="checkbox"/> | <input type="checkbox"/> | <input type="checkbox"/>                   |
| I feel a sense of belonging in my classes (2)            | <input type="checkbox"/> | <input type="checkbox"/> | <input type="checkbox"/> | <input type="checkbox"/>                   |
| I am encouraged to think critically in my classes (10)   | <input type="checkbox"/> | <input type="checkbox"/> | <input type="checkbox"/> | <input type="checkbox"/>                   |
| I am often disrupted by other students in my classes (3) | <input type="checkbox"/> | <input type="checkbox"/> | <input type="checkbox"/> | <input type="checkbox"/>                   |
| My professors are approachable (4)                       | <input type="checkbox"/> | <input type="checkbox"/> | <input type="checkbox"/> | <input type="checkbox"/>                   |
| My professors care about my academic success (5)         | <input type="checkbox"/> | <input type="checkbox"/> | <input type="checkbox"/> | <input type="checkbox"/>                   |
| My professors encourage class participation (6)          | <input type="checkbox"/> | <input type="checkbox"/> | <input type="checkbox"/> | <input type="checkbox"/>                   |
| My professors are creative with their teaching style (7) | <input type="checkbox"/> | <input type="checkbox"/> | <input type="checkbox"/> | <input type="checkbox"/>                   |
| My TAs are approachable (8)                              | <input type="checkbox"/> | <input type="checkbox"/> | <input type="checkbox"/> | <input type="checkbox"/>                   |
| My evaluations are fair (9)                              | <input type="checkbox"/> | <input type="checkbox"/> | <input type="checkbox"/> | <input type="checkbox"/>                   |

Q19 Please indicate if the following teaching styles have been used in the following class sizes. Check all that apply.

|                                        | Small Class (1)          | Medium-Size Class (2)    | Large Class (3)          | This is/was not used in my classes (4) |
|----------------------------------------|--------------------------|--------------------------|--------------------------|----------------------------------------|
| Lecture Only (1)                       | <input type="checkbox"/> | <input type="checkbox"/> | <input type="checkbox"/> | <input type="checkbox"/>               |
| Lecture and Class Discussion (2)       | <input type="checkbox"/> | <input type="checkbox"/> | <input type="checkbox"/> | <input type="checkbox"/>               |
| Lecture and Class Demonstration (3)    | <input type="checkbox"/> | <input type="checkbox"/> | <input type="checkbox"/> | <input type="checkbox"/>               |
| Lecture and Student Group Activity (4) | <input type="checkbox"/> | <input type="checkbox"/> | <input type="checkbox"/> | <input type="checkbox"/>               |
| Others: (6)                            | <input type="checkbox"/> | <input type="checkbox"/> | <input type="checkbox"/> | <input type="checkbox"/>               |

Q20 Please indicate if the following evaluation methods have been used in the following class sizes. Check all that apply

|                                            | Small Class (1)          | Medium-Size Class (2)    | Large Class (3)          | This is/was not used in my classes (4) |
|--------------------------------------------|--------------------------|--------------------------|--------------------------|----------------------------------------|
| Labs (1)                                   | <input type="checkbox"/> | <input type="checkbox"/> | <input type="checkbox"/> | <input type="checkbox"/>               |
| Seminars/Tutorials (2)                     | <input type="checkbox"/> | <input type="checkbox"/> | <input type="checkbox"/> | <input type="checkbox"/>               |
| Quizzes (3)                                | <input type="checkbox"/> | <input type="checkbox"/> | <input type="checkbox"/> | <input type="checkbox"/>               |
| Written Evaluations (e.g. Essays) (4)      | <input type="checkbox"/> | <input type="checkbox"/> | <input type="checkbox"/> | <input type="checkbox"/>               |
| Group Project (6)                          | <input type="checkbox"/> | <input type="checkbox"/> | <input type="checkbox"/> | <input type="checkbox"/>               |
| Oral Presentation (7)                      | <input type="checkbox"/> | <input type="checkbox"/> | <input type="checkbox"/> | <input type="checkbox"/>               |
| Participation in CourseLink Discussion (8) | <input type="checkbox"/> | <input type="checkbox"/> | <input type="checkbox"/> | <input type="checkbox"/>               |
| Midterm (9)                                | <input type="checkbox"/> | <input type="checkbox"/> | <input type="checkbox"/> | <input type="checkbox"/>               |
| Final Examination (10)                     | <input type="checkbox"/> | <input type="checkbox"/> | <input type="checkbox"/> | <input type="checkbox"/>               |
| Others: (5)                                | <input type="checkbox"/> | <input type="checkbox"/> | <input type="checkbox"/> | <input type="checkbox"/>               |



Q21 Has there ever been a time when a numerically large class felt small? Please explain.

Q22 End of Survey

Thank you for your participation! We truly value the information you have provided. Your responses will help us further understand the various dynamics that define class sizes in the College of Biological Sciences at the University of Guelph. If you would like to enter a draw for a chance to win a \$10 Hospitality Services Gift Card, please click on the link below.

<Click for a chance to win 1 of 5 \$10 Hospitality Services Gift Card>

Q23 Thank You for your Interest! We hope that you would reconsider participating in the survey at a later time.

**Supplementary Data Table S1.** Complete dataset of quantified resources and structural components of 171 offerings of 40 unique courses in the Department of Molecular and Cellular Biology at the University of Guelph (2010-2014 excluding summer semesters). Not all variables included in this table were included in the principal components analysis, as indicated by asterisks (\*).

| Class Size Category* | Course Code* | Semester Offered** | Student Enrollment* | Number of Instructors | Number of Teaching Assistants | Type of Office Hours | Instructional Method | Number of assignments | Variety |
|----------------------|--------------|--------------------|---------------------|-----------------------|-------------------------------|----------------------|----------------------|-----------------------|---------|
| Large                | BIOC 2580    | W12                | 412                 | 2                     | 4.5                           | Open                 | Lecture and lab      | 4                     | 3       |
| Large                | BIOC 2580    | W14                | 423                 | 2                     | 5.5                           | Open                 | Lecture and lab      | 4                     | 3       |
| Large                | BIOC 2580    | W11                | 434                 | 2                     | 4                             | Open                 | Lecture and lab      | 4                     | 3       |
| Large                | BIOC 2580    | W13                | 468                 | 2                     | 5.5                           | Open                 | Lecture and lab      | 4                     | 3       |
| Large                | BIOC 2580    | F10                | 946                 | 2                     | 13                            | Open                 | Lecture and lab      | 4                     | 3       |
| Large                | BIOC 2580    | F11                | 1022                | 2                     | 11                            | Open                 | Lecture and lab      | 4                     | 3       |
| Large                | BIOC 2580    | F13                | 1111                | 2                     | 12                            | Open                 | Lecture and lab      | 8                     | 3       |
| Large                | BIOC 2580    | F12                | 1166                | 2                     | 12                            | Open                 | Lecture and lab      | 4                     | 3       |
| Large                | BIOC 3560    | F13                | 234                 | 2                     | 1.5                           | Open                 | Lecture only         | 2                     | 1       |
| Large                | BIOC 3560    | F12                | 240                 | 2                     | 1.5                           | Open                 | Lecture only         | 2                     | 1       |
| Large                | BIOC 3560    | F11                | 263                 | 2                     | 1.5                           | Open                 | Lecture only         | 2                     | 1       |
| Large                | BIOC 3560    | F10                | 265                 | 2                     | 1.5                           | Open                 | Lecture only         | 2                     | 1       |
| Large                | BIOC 3560    | W14                | 519                 | 2                     | 2.5                           | Open                 | Lecture only         | 2                     | 1       |
| Large                | BIOC 3560    | W12                | 569                 | 2                     | 2.5                           | Open                 | Lecture only         | 2                     | 1       |
| Large                | BIOC 3560    | W13                | 573                 | 2                     | 2.5                           | Open                 | Lecture only         | 2                     | 1       |
| Large                | BIOC 3560    | W11                | 578                 | 2                     | 2.5                           | Open                 | Lecture only         | 2                     | 1       |
| Small                | BIOC 3570    | F11                | 35                  | 1                     | 0.5                           | By appointment       | Lecture and lab      | 14                    | 4       |
| Small                | BIOC 3570    | F10                | 36                  | 1                     | 1                             | By appointment       | Lecture and lab      | 14                    | 4       |
| Small                | BIOC 3570    | F12                | 41                  | 1                     | 1                             | By appointment       | Lecture and lab      | 15                    | 5       |
| Medium               | BIOC 3570    | F13                | 50                  | 1                     | 1.5                           | Open                 | Lecture and lab      | 15                    | 5       |
| Small                | BIOC 4540    | W13                | 30                  | 1                     | 1                             | Open                 | Lecture and lab      | 4                     | 3       |
| Small                | BIOC 4540    | W11                | 35                  | 1                     | 0.5                           | Open                 | Lecture and lab      | 3                     | 2       |
| Small                | BIOC 4540    | W14                | 39                  | 1                     | 1                             | Open                 | Lecture and lab      | 4                     | 3       |
| Medium               | BIOC 4540    | W12                | 54                  | 1                     | 1                             | Open                 | Lecture and lab      | 3                     | 2       |
| Medium               | BIOC 4580    | W14                | 76                  | 1                     | 0.5                           | Open                 | Lecture only         | 4                     | 2       |
| Medium               | BIOC 4580    | W11                | 83                  | 1                     | 0.5                           | Open                 | Lecture only         | 4                     | 2       |
| Medium               | BIOC 4580    | W13                | 91                  | 1                     | 0.5                           | Open                 | Lecture only         | 4                     | 2       |
| Medium               | BIOC 4580    | W12                | 103                 | 1                     | 0.5                           | Open                 | Lecture only         | 4                     | 2       |
| Small                | BIOC4520     | F12                | 45                  | 1                     | 0                             | Open                 | Lecture only         | 5                     | 3       |
| Small                | BIOC4520     | F10                | 46                  | 1                     | 0                             | Open                 | Lecture only         | 5                     | 3       |
| Small                | BIOC4520     | F13                | 49                  | 1                     | 0                             | Open                 | Lecture only         | 5                     | 3       |

|        |           |     |      |     |      |                |                     |    |   |
|--------|-----------|-----|------|-----|------|----------------|---------------------|----|---|
| Medium | BIOC4520  | F11 | 77   | 1   | 0    | Open           | Lecture only        | 5  | 3 |
| Large  | BIOL 1090 | F10 | 283  | 2.5 | 3    | Not listed     | Lecture and seminar | 10 | 5 |
| Large  | BIOL 1090 | F11 | 540  | 2.5 | 5    | Open           | Lecture and seminar | 10 | 5 |
| Large  | BIOL 1090 | F13 | 894  | 2.5 | 10   | Open           | Lecture and seminar | 10 | 5 |
| Large  | BIOL 1090 | W14 | 915  | 2.5 | 10   | Open           | Lecture and seminar | 10 | 5 |
| Large  | BIOL 1090 | F12 | 926  | 2.5 | 10   | Open           | Lecture and seminar | 10 | 5 |
| Large  | BIOL 1090 | W13 | 962  | 2.5 | 10   | Open           | Lecture and seminar | 10 | 5 |
| Large  | BIOL 1090 | W11 | 975  | 2.5 | 9    | Open           | Lecture and seminar | 10 | 5 |
| Large  | BIOL 1090 | W12 | 1481 | 2.5 | 14   | Open           | Lecture and seminar | 10 | 5 |
| Medium | BOT 2100  | F10 | 66   | 2   | 1.5  | Not listed     | Lecture and lab     | 4  | 3 |
| Medium | BOT 2100  | W14 | 68   | 1   | 2    | Not listed     | Lecture and lab     | 4  | 3 |
| Medium | BOT 2100  | W12 | 77   | 1   | 2    | Not listed     | Lecture and lab     | 4  | 3 |
| Medium | BOT 2100  | F12 | 79   | 1   | 2    | Not listed     | Lecture and lab     | 4  | 3 |
| Medium | BOT 2100  | F11 | 82   | 1   | 2    | Not listed     | Lecture and lab     | 4  | 3 |
| Medium | BOT 2100  | W13 | 82   | 1   | 2    | Not listed     | Lecture and lab     | 4  | 3 |
| Medium | BOT 2100  | W11 | 84   | 2   | 1.5  | Not listed     | Lecture and lab     | 4  | 3 |
| Medium | BOT 2100  | F13 | 88   | 1   | 2    | Not listed     | Lecture and lab     | 4  | 3 |
| Small  | BOT 3310  | W12 | 49   | 1   | 1    | Open           | Lecture and lab     | 4  | 3 |
| Medium | BOT 3310  | W14 | 53   | 1   | 1    | Open           | Lecture and lab     | 4  | 3 |
| Medium | BOT 3310  | W11 | 55   | 2   | 1    | Open           | Lecture and lab     | 4  | 3 |
| Medium | BOT 3310  | W13 | 59   | 2   | 1    | Open           | Lecture and lab     | 4  | 3 |
| Small  | BOT 3410  | F12 | 27   | 1   | 0.5  | By appointment | Lecture and lab     | 6  | 3 |
| Small  | BOT 3410  | F13 | 31   | 1   | 1    | By appointment | Lecture and lab     | 4  | 4 |
| Small  | BOT 3410  | F11 | 43   | 1   | 1    | By appointment | Lecture and lab     | 6  | 3 |
| Small  | BOT 3410  | F10 | 45   | 1   | 1    | By appointment | Lecture and lab     | 6  | 3 |
| Medium | BOT 4380  | W11 | 50   | 2   | 0    | By appointment | Lecture only        | 3  | 2 |
| Medium | BOT 4380  | W14 | 51   | 2   | 0    | By appointment | Lecture only        | 3  | 2 |
| Medium | BOT 4380  | W12 | 52   | 1   | 0    | By appointment | Lecture only        | 7  | 3 |
| Medium | BOT 4380  | W13 | 54   | 2   | 0    | By appointment | Lecture only        | 3  | 2 |
| Large  | MBG 2000  | W11 | 268  | 1   | 2    | By appointment | Lecture and seminar | 3  | 1 |
| Large  | MBG 2000  | F10 | 1106 | 2   | 6    | By appointment | Lecture and seminar | 2  | 1 |
| Medium | MBG 2020  | F10 | 182  | 2   | 1.25 | By appointment | Lecture and seminar | 3  | 1 |
| Large  | MBG 2020  | W11 | 684  | 2   | 5.25 | By appointment | Lecture and seminar | 3  | 1 |
| Large  | MBG 2040  | W14 | 407  | 2   | 2.5  | Open           | Lecture and seminar | 3  | 2 |
| Large  | MBG 2040  | W12 | 427  | 2   | 2    | Not listed     | Lecture and seminar | 3  | 2 |
| Large  | MBG 2040  | W13 | 469  | 2   | 2.5  | By appointment | Lecture and seminar | 3  | 2 |
| Large  | MBG 2040  | F13 | 1124 | 2   | 6    | By appointment | Lecture and seminar | 3  | 2 |

|        |          |     |      |   |     |                |                     |    |   |
|--------|----------|-----|------|---|-----|----------------|---------------------|----|---|
| Large  | MBG 2040 | F12 | 1176 | 2 | 6   | Not listed     | Lecture and seminar | 3  | 2 |
| Large  | MBG 2040 | F11 | 1189 | 2 | 6   | Not listed     | Lecture and seminar | 3  | 2 |
| Medium | MBG 3050 | W14 | 70   | 1 | 1   | By appointment | Lecture and lab     | 4  | 3 |
| Medium | MBG 3050 | W12 | 73   | 1 | 1   | By appointment | Lecture and lab     | 4  | 3 |
| Medium | MBG 3050 | W13 | 76   | 1 | 1   | By appointment | Lecture and lab     | 4  | 3 |
| Medium | MBG 3050 | W11 | 83   | 1 | 1.5 | By appointment | Lecture and lab     | 4  | 3 |
| Medium | MBG 3080 | F11 | 76   | 2 | 0   | Not listed     | Lecture only        | 5  | 3 |
| Medium | MBG 3080 | F12 | 87   | 2 | 0.5 | Open           | Lecture only        | 7  | 3 |
| Medium | MBG 3080 | F13 | 107  | 2 | 0   | Not listed     | Lecture only        | 7  | 3 |
| Medium | MBG 3350 | F12 | 58   | 1 | 3   | By appointment | Lab methods         | 12 | 6 |
| Medium | MBG 3350 | F10 | 72   | 1 | 5   | By appointment | Lab methods         | 12 | 3 |
| Medium | MBG 3350 | F13 | 73   | 1 | 4   | Open           | Lab methods         | 12 | 6 |
| Medium | MBG 3350 | W12 | 75   | 1 | 3   | Open           | Lab methods         | 12 | 6 |
| Medium | MBG 3350 | W11 | 78   | 1 | 4   | By appointment | Lab methods         | 12 | 4 |
| Medium | MBG 3350 | F11 | 78   | 1 | 5   | By appointment | Lab methods         | 12 | 7 |
| Medium | MBG 3350 | W14 | 85   | 1 | 5   | Open           | Lab methods         | 12 | 7 |
| Medium | MBG 3350 | W13 | 94   | 1 | 5   | Open           | Lab methods         | 12 | 6 |
| Small  | MBG 3660 | W11 | 38   | 1 | 0   | Not listed     | Lecture only        | 3  | 2 |
| Medium | MBG 3660 | F12 | 52   | 1 | 0   | Not listed     | Lecture only        | 3  | 2 |
| Medium | MBG 3660 | W14 | 55   | 1 | 0   | Not listed     | Lecture only        | 4  | 2 |
| Medium | MBG 3660 | F11 | 68   | 1 | 0   | Not listed     | Lecture only        | 3  | 2 |
| Small  | MBG 4070 | F13 | 29   | 1 | 0   | Open           | Lecture only        | 3  | 2 |
| Small  | MBG 4070 | F12 | 38   | 1 | 0   | Open           | Lecture only        | 3  | 2 |
| Small  | MBG 4070 | F10 | 44   | 1 | 0.5 | Not listed     | Lecture only        | 3  | 2 |
| Medium | MBG 4070 | F11 | 57   | 1 | 0   | Open           | Lecture only        | 3  | 2 |
| Small  | MBG 4080 | W14 | 22   | 1 | 0   | Open           | Lecture only        | 5  | 5 |
| Small  | MBG 4080 | W11 | 23   | 1 | 0   | Open           | Lecture only        | 4  | 3 |
| Small  | MBG 4080 | W13 | 27   | 1 | 0   | Open           | Lecture only        | 5  | 5 |
| Small  | MBG 4080 | W12 | 29   | 1 | 0   | Open           | Lecture only        | 5  | 3 |
| Medium | MBG 4080 | F10 | 51   | 1 | 0   | Not listed     | Lecture only        | 3  | 2 |
| Medium | MBG 4080 | F12 | 68   | 1 | 0.5 | Not listed     | Lecture only        | 4  | 2 |
| Medium | MBG 4080 | F11 | 76   | 1 | 0.5 | Not listed     | Lecture only        | 3  | 2 |
| Medium | MBG 4080 | F13 | 80   | 1 | 0.5 | Not listed     | Lecture only        | 4  | 2 |
| Small  | MBG 4110 | F13 | 36   | 1 | 0   | Not listed     | Lecture only        | 8  | 3 |
| Small  | MBG 4110 | F12 | 41   | 1 | 0   | Not listed     | Lecture only        | 9  | 3 |
| Medium | MBG 4110 | F11 | 51   | 1 | 0   | Not listed     | Lecture only        | 3  | 3 |
| Medium | MBG 4110 | F10 | 56   | 1 | 0   | Not listed     | Lecture only        | 3  | 2 |

|        |           |     |     |     |     |                |                     |    |   |
|--------|-----------|-----|-----|-----|-----|----------------|---------------------|----|---|
| Small  | MBG 4240  | W11 | 40  | 1   | 0   | Open           | Lecture only        | 5  | 3 |
| Medium | MBG 4240  | W13 | 50  | 1   | 0   | Open           | Lecture only        | 4  | 3 |
| Medium | MBG 4240  | W14 | 50  | 1   | 0   | Open           | Lecture only        | 4  | 3 |
| Medium | MBG 4240  | W12 | 59  | 1   | 0.5 | Open           | Lecture only        | 4  | 3 |
| Small  | MBG 4270  | W13 | 35  | 1   | 0   | Not listed     | Lecture only        | 3  | 2 |
| Medium | MBG 4270  | W11 | 59  | 1   | 0   | Not listed     | Lecture only        | 4  | 3 |
| Medium | MBG 4270  | W12 | 71  | 1   | 0   | Not listed     | Lecture only        | 3  | 2 |
| Medium | MCB 2050  | F12 | 101 | 2   | 1   | Not listed     | Lecture and seminar | 3  | 8 |
| Medium | MCB 2050  | F13 | 170 | 2   | 1.5 | Not listed     | Lecture and seminar | 3  | 8 |
| Large  | MCB 2050  | W12 | 615 | 2   | 4   | Not listed     | Lecture and seminar | 3  | 8 |
| Large  | MCB 2050  | W13 | 751 | 2   | 4   | Not listed     | Lecture and seminar | 3  | 8 |
| Large  | MCB 2050  | W14 | 772 | 2   | 4.5 | Not listed     | Lecture and seminar | 3  | 8 |
| Medium | MCB 4010  | W13 | 70  | 1   | 0.5 | Not listed     | Lecture only        | 4  | 3 |
| Medium | MCB 4010  | W14 | 71  | 1   | 0.5 | By appointment | Lecture only        | 4  | 3 |
| Medium | MCB 4010  | W11 | 77  | 1   | 0.5 | Not listed     | Lecture only        | 4  | 3 |
| Medium | MCB 4010  | W12 | 83  | 1   | 0.5 | Not listed     | Lecture only        | 4  | 3 |
| Small  | MCB 4050  | F13 | 37  | 1   | 0   | By appointment | Lecture only        | 3  | 2 |
| Small  | MCB 4050  | F10 | 42  | 1   | 0   | By appointment | Lecture only        | 3  | 2 |
| Medium | MCB 4050  | F12 | 68  | 1   | 0   | By appointment | Lecture only        | 3  | 2 |
| Medium | MCB 4050  | F11 | 78  | 1   | 0.5 | By appointment | Lecture only        | 3  | 2 |
| Medium | MICR 2420 | W12 | 185 | 1.5 | 2   | By appointment | Lecture and lab     | 4  | 3 |
| Medium | MICR 2420 | W14 | 186 | 1.5 | 2   | By appointment | Lecture and lab     | 4  | 3 |
| Medium | MICR 2420 | W13 | 190 | 1.5 | 2   | By appointment | Lecture and lab     | 4  | 3 |
| Medium | MICR 2420 | F11 | 224 | 2.5 | 3   | By appointment | Lecture and lab     | 4  | 3 |
| Large  | MICR 2420 | F12 | 270 | 2.5 | 3.5 | By appointment | Lecture and lab     | 4  | 2 |
| Large  | MICR 2420 | F13 | 274 | 1.5 | 3   | By appointment | Lecture and lab     | 5  | 3 |
| Small  | MICR 2430 | F12 | 41  | 1   | 1.5 | By appointment | Lab methods         | 43 | 8 |
| Small  | MICR 2430 | F13 | 48  | 1   | 1.5 | By appointment | Lab methods         | 31 | 8 |
| Medium | MICR 2430 | W12 | 93  | 1   | 2.5 | By appointment | Lab methods         | 6  | 6 |
| Medium | MICR 2430 | W13 | 114 | 1   | 2.5 | By appointment | Lab methods         | 40 | 7 |
| Medium | MICR 2430 | W14 | 123 | 1   | 3   | By appointment | Lab methods         | 37 | 7 |
| Small  | MICR 3090 | F12 | 21  | 1   | 1   | Not listed     | Lecture and lab     | 4  | 3 |
| Small  | MICR 3090 | F13 | 28  | 1   | 1   | Not listed     | Lecture and lab     | 3  | 3 |
| Large  | MICR 3230 | F12 | 336 | 2   | 0.5 | Open           | Lecture only        | 3  | 2 |
| Large  | MICR 3230 | F13 | 375 | 2   | 0.5 | Open           | Lecture only        | 3  | 2 |
| Large  | MICR 3230 | F10 | 393 | 2   | 0.5 | Open           | Lecture only        | 2  | 1 |
| Large  | MICR 3230 | F11 | 427 | 2   | 0.5 | Open           | Lecture only        | 3  | 2 |

|        |           |     |     |   |     |                |                     |   |   |
|--------|-----------|-----|-----|---|-----|----------------|---------------------|---|---|
| Small  | MICR 3260 | W12 | 28  | 1 | 0.5 | Not listed     | Lecture and seminar | 6 | 4 |
| Small  | MICR 3260 | W11 | 29  | 1 | 0.5 | Not listed     | Lecture and seminar | 6 | 4 |
| Small  | MICR 3260 | W13 | 45  | 1 | 1   | Not listed     | Lecture and seminar | 5 | 3 |
| Small  | MICR 3260 | W14 | 47  | 1 | 0.5 | Not listed     | Lecture and seminar | 6 | 4 |
| Medium | MICR 3330 | F13 | 88  | 1 | 0   | Open           | Lecture only        | 3 | 2 |
| Medium | MICR 3330 | F10 | 105 | 2 | 0   | Not listed     | Lecture only        | 3 | 2 |
| Medium | MICR 3330 | F11 | 135 | 1 | 0   | Not listed     | Lecture only        | 3 | 2 |
| Medium | MICR 3330 | F12 | 137 | 1 | 0   | Not listed     | Lecture only        | 3 | 2 |
| Small  | MICR 3420 | F12 | 43  | 1 | 0   | Not listed     | Lecture only        | 5 | 4 |
| Medium | MICR 3420 | F13 | 54  | 1 | 0   | Not listed     | Lecture only        | 4 | 4 |
| Small  | MICR 3430 | W13 | 37  | 1 | 1   | Not listed     | Lab methods         | 4 | 4 |
| Small  | MICR 3430 | W14 | 47  | 1 | 1   | By appointment | Lab methods         | 4 | 4 |
| Small  | MICR 4010 | W14 | 25  | 1 | 0   | By appointment | Lecture only        | 6 | 3 |
| Small  | MICR 4010 | W11 | 27  | 1 | 0   | Not listed     | Lecture only        | 5 | 2 |
| Small  | MICR 4010 | W13 | 29  | 1 | 0   | Not listed     | Lecture only        | 6 | 3 |
| Small  | MICR 4010 | W12 | 37  | 1 | 0   | Not listed     | Lecture only        | 5 | 2 |
| Small  | MICR 4280 | W12 | 15  | 1 | 0   | Not listed     | Lecture only        | 4 | 2 |
| Small  | MICR 4280 | W14 | 16  | 1 | 0   | Open           | Lecture only        | 5 | 3 |
| Small  | MICR 4280 | W11 | 28  | 1 | 0   | Not listed     | Lecture only        | 4 | 2 |
| Small  | MICR 4280 | W13 | 29  | 1 | 0   | Not listed     | Lecture only        | 4 | 3 |
| Small  | MICR 4330 | W12 | 21  | 1 | 0.5 | Not listed     | Lecture only        | 4 | 3 |
| Small  | MICR 4330 | W14 | 22  | 1 | 0.5 | Not listed     | Lecture only        | 4 | 3 |
| Small  | MICR 4330 | W11 | 23  | 2 | 1   | Not listed     | Lecture only        | 4 | 3 |
| Small  | MICR 4330 | W13 | 27  | 1 | 0.5 | Not listed     | Lecture only        | 4 | 4 |
| Small  | MICR 4520 | F12 | 10  | 2 | 0   | By appointment | Lecture only        | 3 | 2 |
| Small  | MICR 4520 | F13 | 12  | 1 | 0   | By appointment | Lecture only        | 3 | 2 |
| Medium | MICR 4530 | W14 | 53  | 2 | 0.5 | Open           | Lecture only        | 3 | 2 |
| Medium | MICR 4530 | W13 | 59  | 2 | 0.5 | Open           | Lecture only        | 3 | 2 |
| Medium | MICR 4530 | W12 | 72  | 2 | 0.5 | Open           | Lecture only        | 3 | 2 |

\* Indicates variables not included in the principal components analysis

\*\* F represents University of Guelph's Fall semester (Sept-Dec); W represents winter semester (Jan-April).
